## Volume 2 Fall Issue

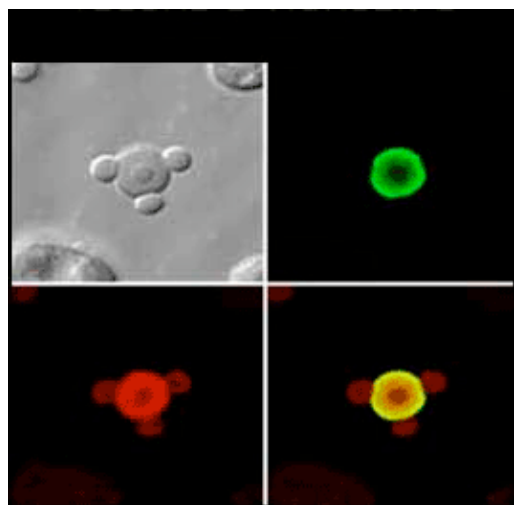

### Table of Contents

Use Arrows to Browse  
Previous Issues

#### Contact CBE

8120 Woodmont Avenue Suite  
750  
Bethesda, Maryland 20814-  
2762  
Phone: (301) 347-9300  
Fax: (301) 347-9350  
[cbe@ascb.org](mailto:cbe@ascb.org)

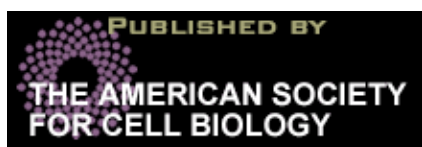

[Editorial Board Member Login](#)

## FEATURES

- **Approaches to Cell Biology Teaching: Mapping the Journey - Concept Maps as Signposts of Developing Knowledge Structures**  
by Deborah Allen and Kimberly Tanner
- **Video Views and Reviews**  
by Christopher Watters
- **WWW.Cell Biology Education**  
by Robert Blystone
- **Education at the National Academies<sup>1</sup>**  
by Jay B. Labov
- **Review of: *Biochemistry*, by Jeremy Mark Berg, John L. Tymoczko, and Lubert Stryer**  
**Promising New Directions in Biochemistry**  
by Baldomero M. Olivera
- **Review of: *Modules in Emerging Fields. Volume 4: Genomics and Proteomics*, by Lucienne Ronco, Martha Grossel, Marc Zimmer, and Thomas Socash; CD-ROM**  
**The New Industrialized Approach to Biology**  
by Alan D. Attie
- **Review of: *Roche Genetics: Education Program***  
**Waiting for 4.1**  
by Karen Bernd

Supported in part by an Undergraduate Science Education Program grant from the Howard Hughes Medical Institute

## ESSAY

---

- **Bioliteracy and Teaching Efficacy: What Biologists Can Learn from Physicists**  
by Michael W. Klymkowsky, Kathy Garvin-Doxas, and Michael Zeilik

## ARTICLES

---

- **Design and Performance Frameworks for Constructing Problem-Solving Simulations**  
by Ron Stevens and Joycelin Palacio-Cayetano
- **Teaching Cell Biology in the Large-Enrollment Classroom: Methods to Promote Analytical Thinking and Assessment of Their Effectiveness**  
by Elizabeth Kitchen, John D. Bell, Suzanne Reeve, Richard R. Sudweeks, and William S. Bradshaw

## ANNOUNCEMENTS

---

September 3–7, 2005, Sydney, Australia  
**15th International Society of Developmental Biologists Congress**

### Submit Your Manuscript

Online Manuscript Submission

- **Instructions to Authors**
- **Top Ten Reasons to Publish in CBE**  
[pdf]

### Other Information:

There are **6,450** registered users signed up to receive quarterly notification of new content.

[Become a registered user.](#)

## Order a Free CBE Poster

### On the Cover [[Printable Cover](#)]

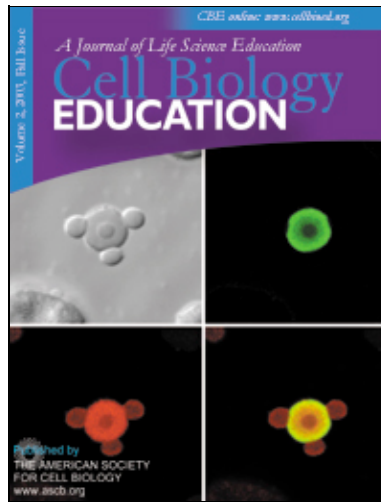

This brightly colored Cajal body from an oocyte nucleus of the frog *Xenopus* is an example of immunofluorescent staining used to localize specific proteins within cells. Upper left:

Differential interference contrast (DIC) image showing a Cajal body and four associated B-snurposomes, three on the surface and one in the interior. Upper right: The Cajal body is stained green by an antibody against the protein coilin. Coilin is a marker protein for the Cajal body, a nuclear organelle involved in assembly and modification of macromolecular complexes that transcribe and process nuclear RNA. Lower left: The Cajal body and its associated B-snurposomes are stained red by an antibody against proteins involved in RNA processing. Lower right: An overlay of the red and green images. —Images courtesy of Joseph Gall, Carnegie Institution, Baltimore, MD; [gall@ciwemb.edu](mailto:gall@ciwemb.edu).
